# Supplementary material for: A latent reversible ratiometric optical pH sensing probe based on phenylboronic acid for alkaline pH detection and applications in test paper and alkalotic HK-2 cells
Source: Royal Society of Chemistry journal article supplement (doi:10.1039/d3nj01398g), 2023-01-01
Supplement: d3nj01398g1.pdf [file d3nj01398g1.pdf]

## Supplementary Information

### **A latent reversible ratiometric optical pH sensing probe based phenylboronic acid for alkaline pH detection and applications in test paper and alkalotic HK-2 cells**

*Hufeng Fang<sup>1\*</sup>, Shan Xu<sup>1</sup>, Jinhong Gong<sup>1</sup>, Lidan Tang<sup>1</sup>, Xiaomei He<sup>1</sup>, Ying Lin<sup>1</sup>,  
Hao Yang<sup>1</sup>, Kun Yan<sup>1</sup>, Dan Su<sup>1\*</sup>, Yujing Leng<sup>1\*</sup>*

<sup>1</sup>Department of Pharmacy, the Affiliated Changzhou No.2 People's Hospital of  
Nanjing Medical University, Changzhou 213100, China

\*Corresponding authors

Dan Su: [bjj4461@163.com](mailto:bjj4461@163.com)

Hufeng Fang: [czeyfhf@163.com](mailto:czeyfhf@163.com)

Yujing Leng: [yujing\\_leng@126.com](mailto:yujing_leng@126.com)

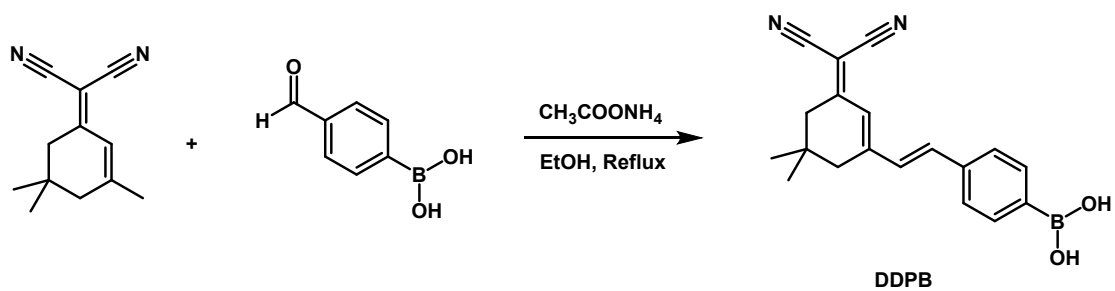

Scheme 1 The synthetic procedure of DDPB.

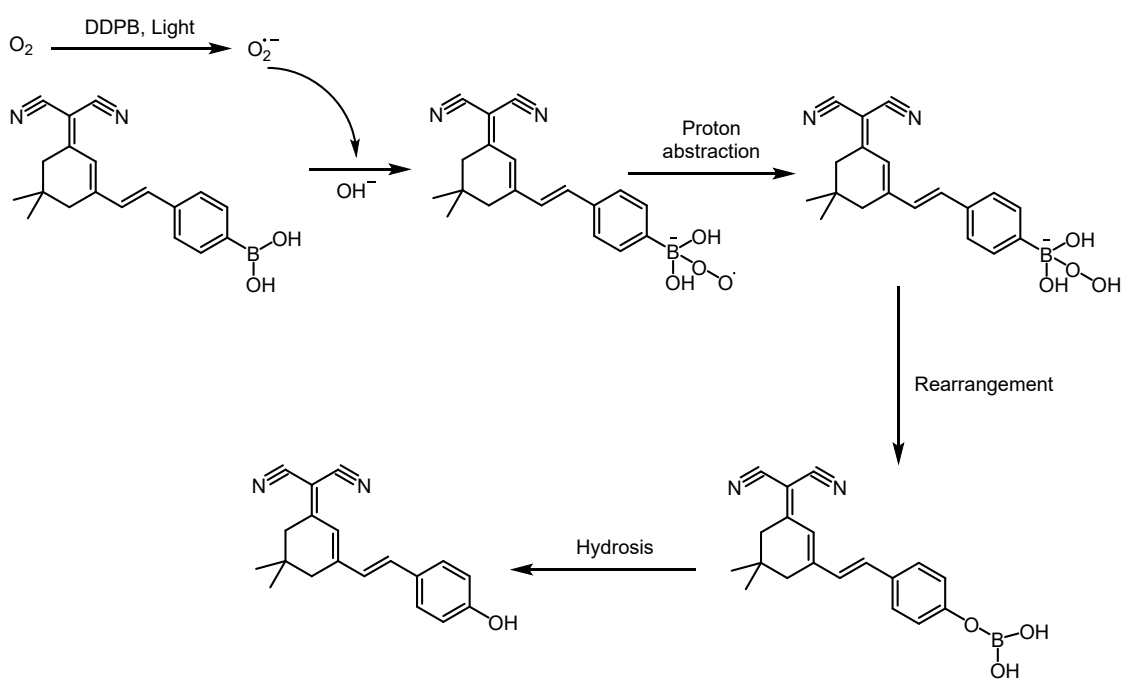

Scheme 2 The proposed reaction pathways of visible light mediated aerobic hydroxylation of DDPB.

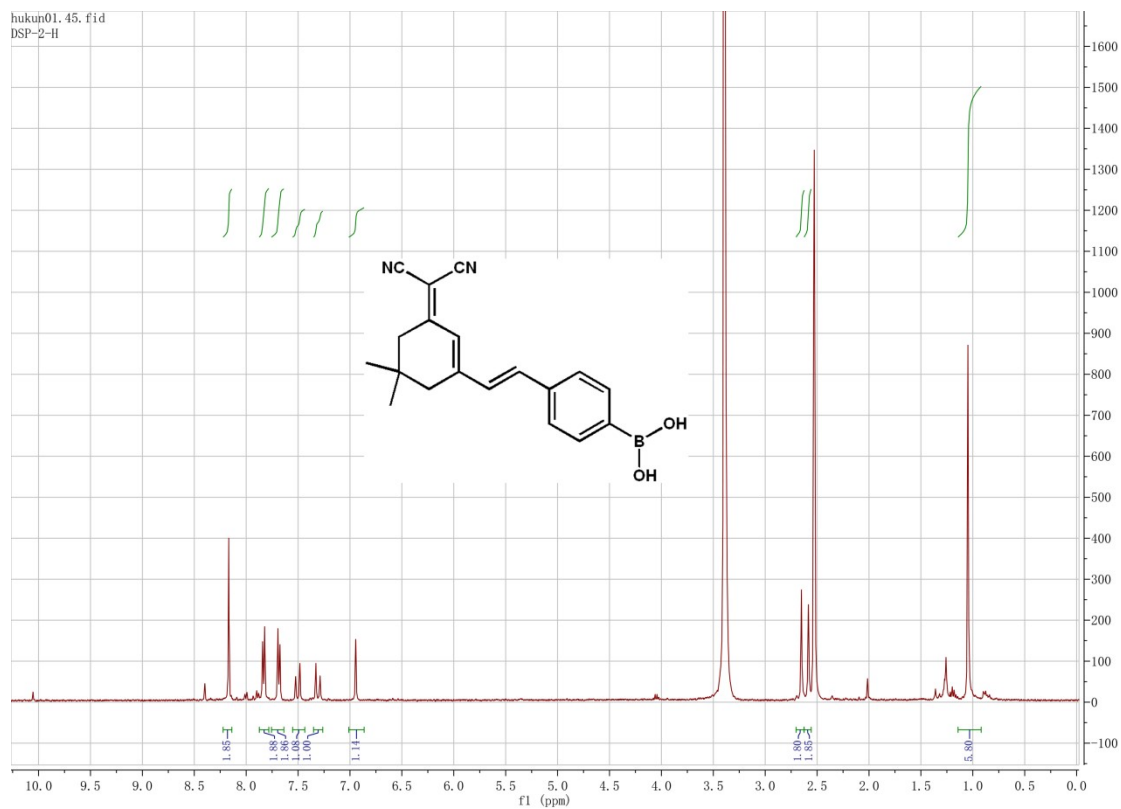

Figure S1.  $^1\text{H}$  NMR spectrum of DDPB.

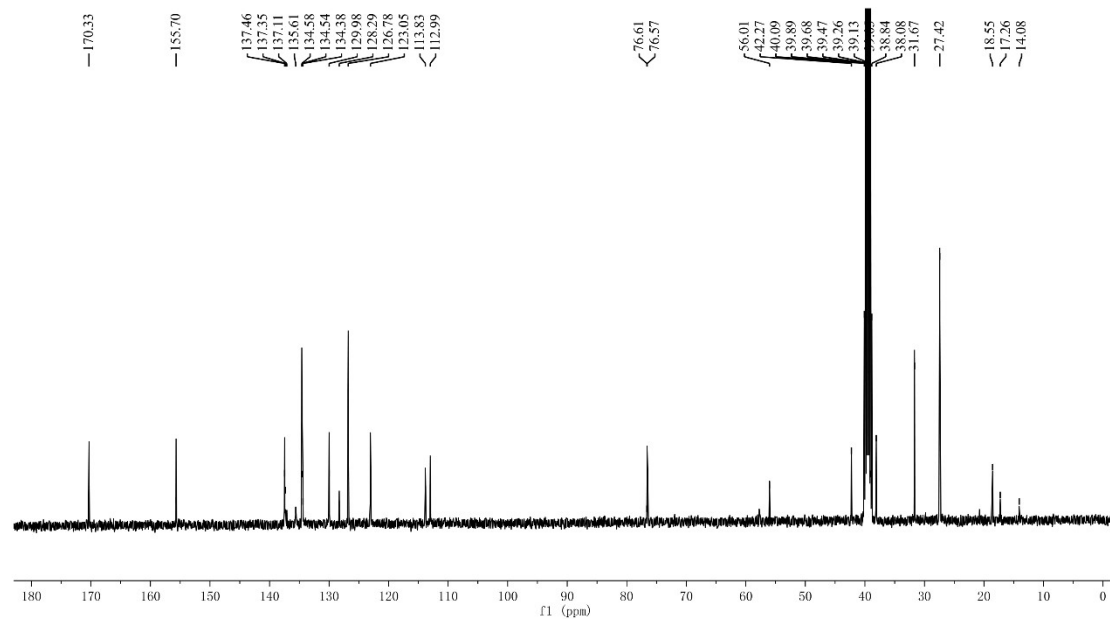

Figure S2.  $^{13}\text{C}$  NMR spectrum of DDPB.

0222-fu #23 RT: 0.29 AV: 1 NL: 5.56E+005  
T: FTMS - p ESI Full ms [146.7000-2200.0000]

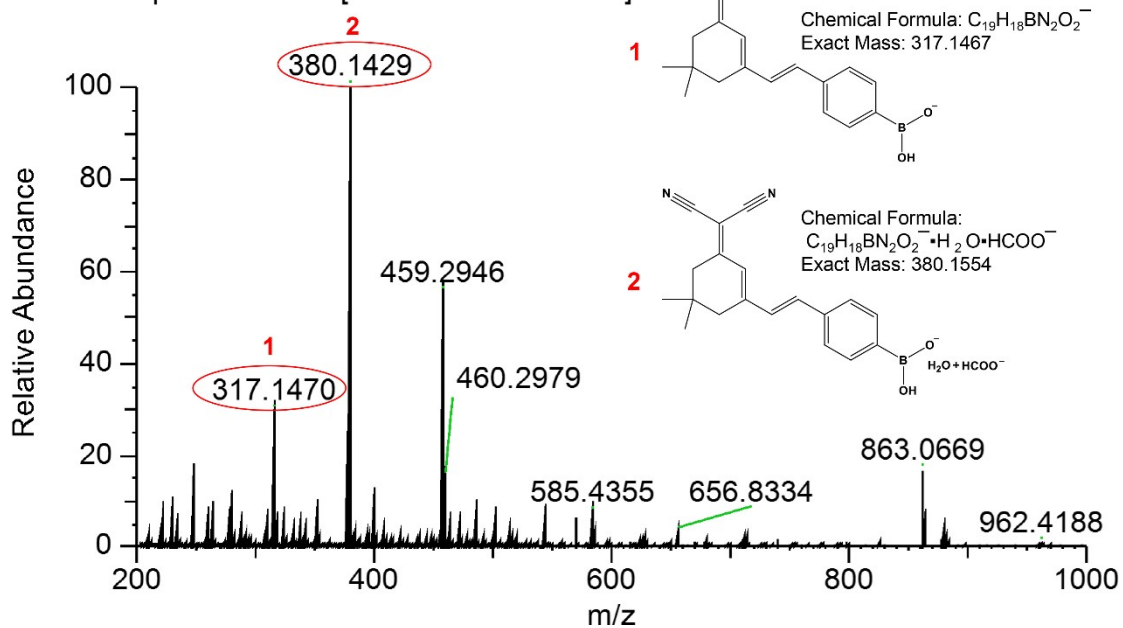

Figure S3. ESI-MS spectrum of DDPB.

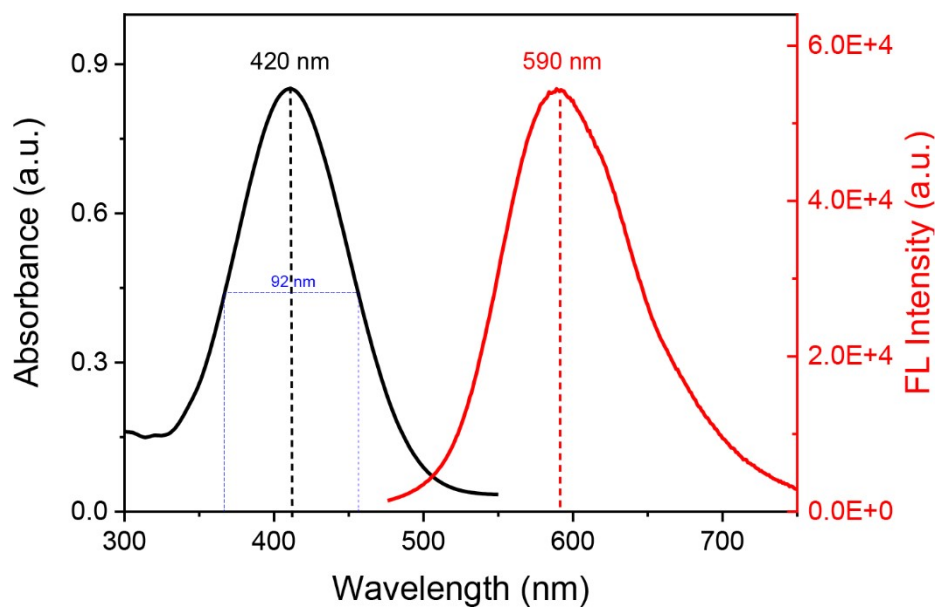

Figure S4. UV-vis spectrum (black line) and fluorescence emission spectrum (red line) of DDPB (dissolved in 20% ethanol solution). The excitation wavelength was 430 nm.

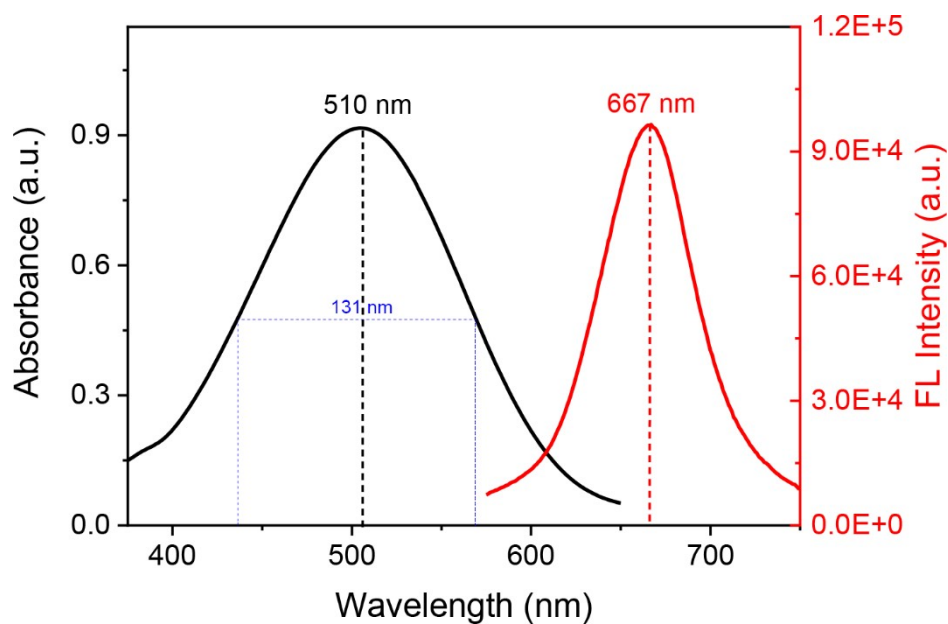

Figure S5. Absorbance spectrum (black line) and fluorescence emission spectrum (red line) of DDPB (incubated in PBS-ethanol solution with pH 10.23).

The excitation wavelength was 490 nm.

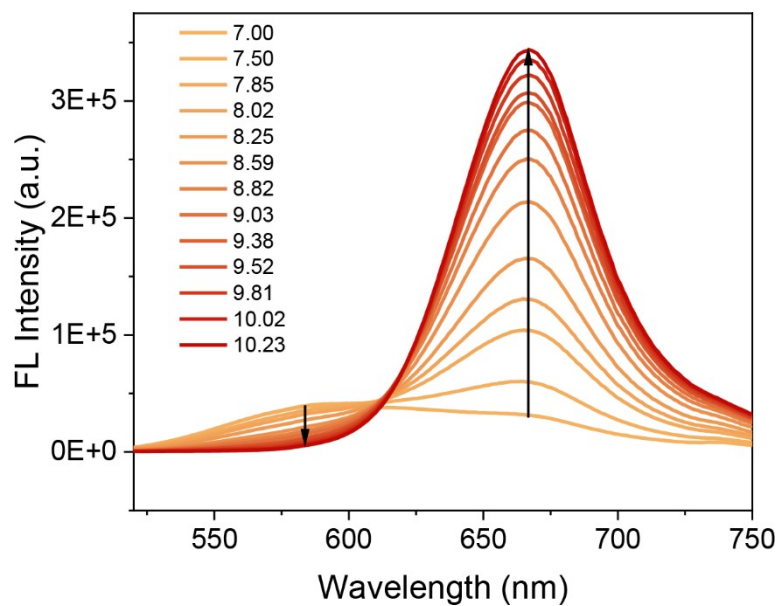

Figure S6. Fluorescence spectra responses of DDPB (30  $\mu$ M) incubate with 20% ethanol 20 mM phosphate buffer solution with different pH value (from 7.00 to 10.23). Fluorescent spectra were recorded at the excitation wavelength of 490 nm with 5/10 nm slit widths.

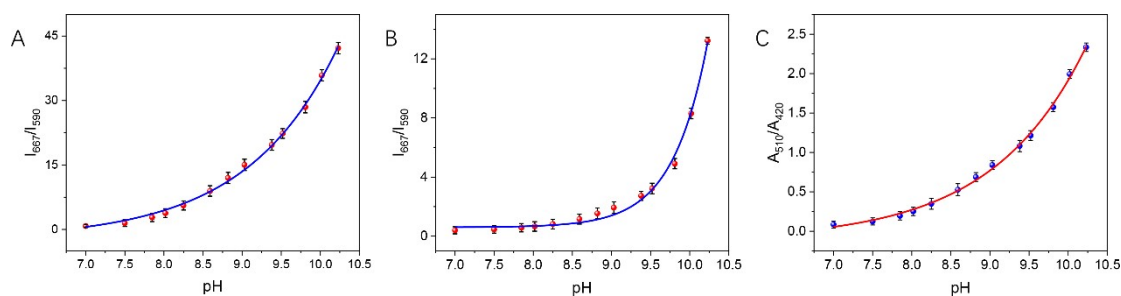

Figure S7. The pH titration curve of DDPB based ratiometric fluorescence emission intensity ( $I_{667\text{ nm}}/I_{590\text{ nm}}$ ). The excitation wavelengths were 490 nm (A) and 430 nm (B) with 5/10 nm slit widths. (C) ExpDec1 curve fitting for absorbance intensity ratio ( $A_{510\text{ nm}}/A_{420\text{ nm}}$ ) in response to pH value.

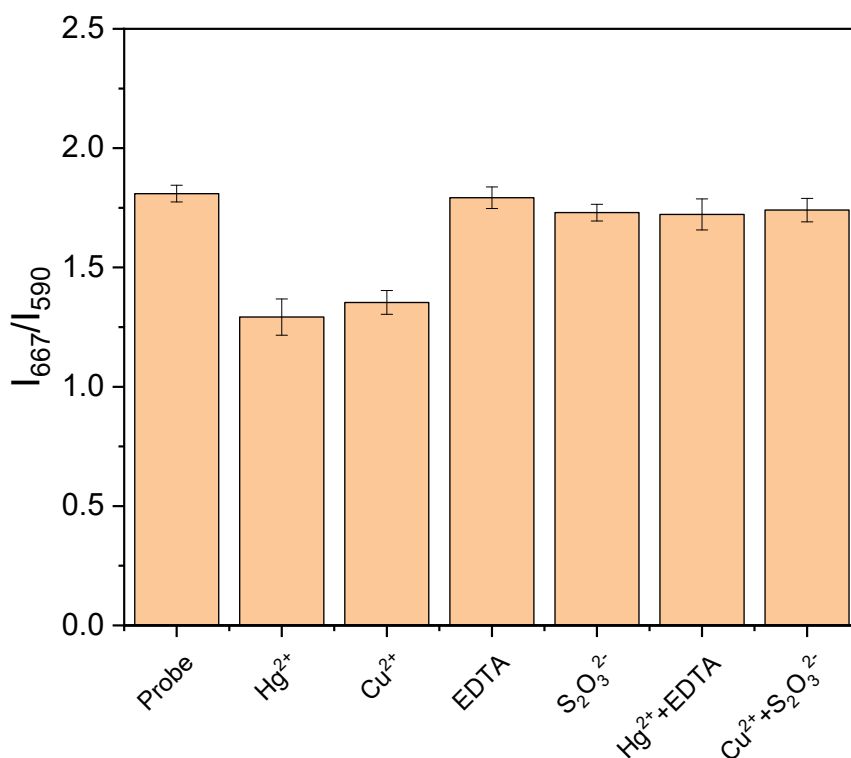

Figure S8 Ratiometric fluorescence responses of DDPB (30  $\mu\text{M}$ ) towards 100  $\mu\text{M}$   $\text{Hg}^{2+}$  and  $\text{Cu}^{2+}$  with the masking effect of 500  $\mu\text{M}$  EDTA and  $\text{S}_2\text{O}_3^{2-}$  in 20% ethanol 20 mM phosphate buffer solution with pH 9.30. Excitation wavelength was 430 nm with 5/10 nm slit widths. Error bars represent the standard deviations ( $n = 3$ ).

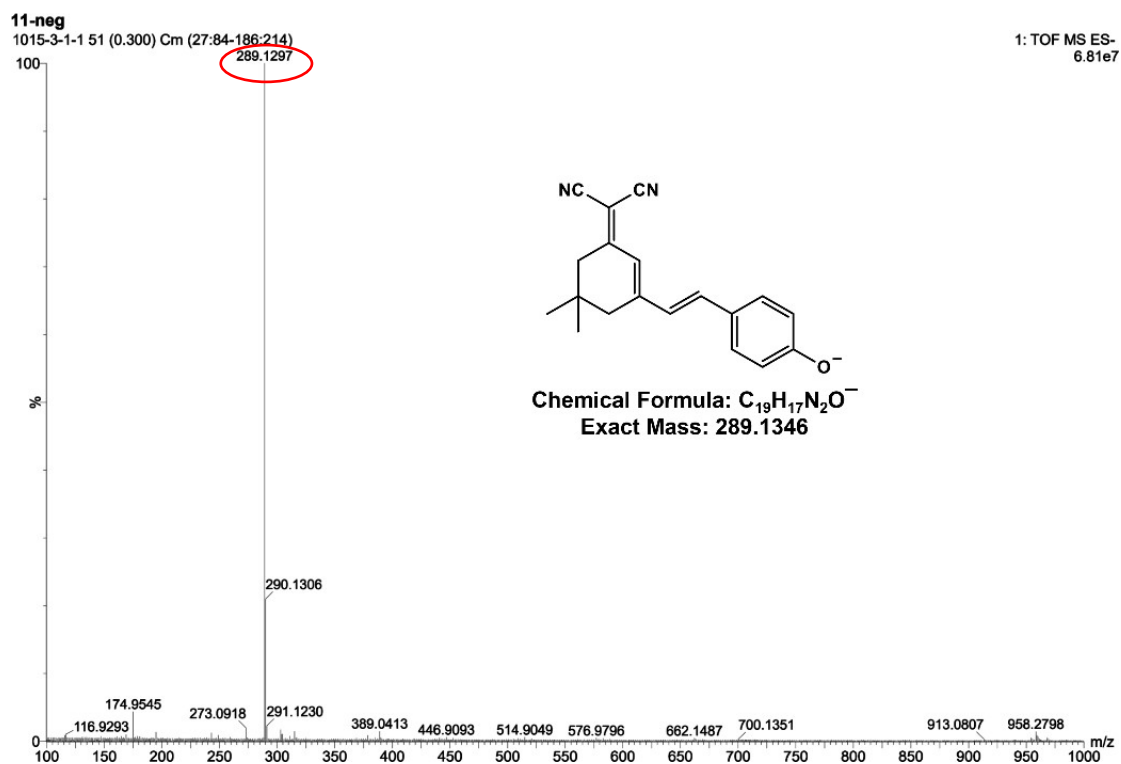

Figure S9. ESI-MS spectrum of the product obtained from reaction mixture of DDPB with 200  $\mu$ M NaOH.

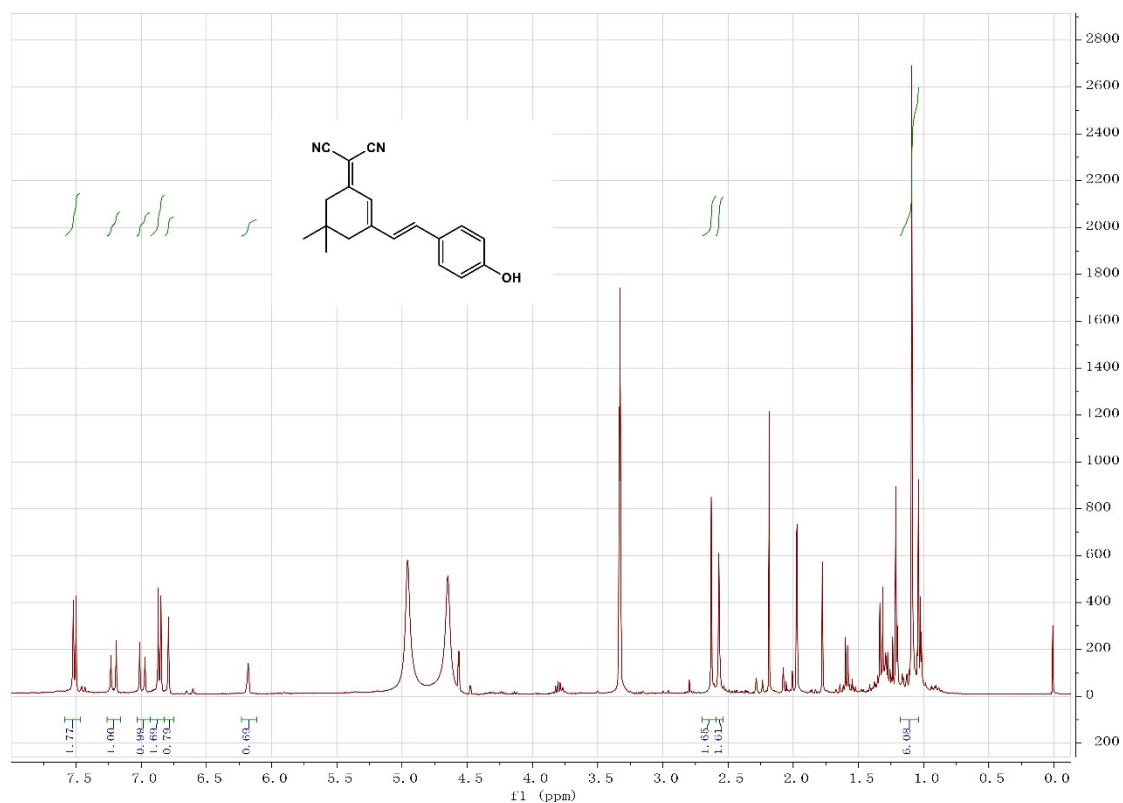

Figure S10.  $^1H$  NMR spectrum of the product obtained from reaction mixture of DDPB with 2  $\mu$ M NaOH.

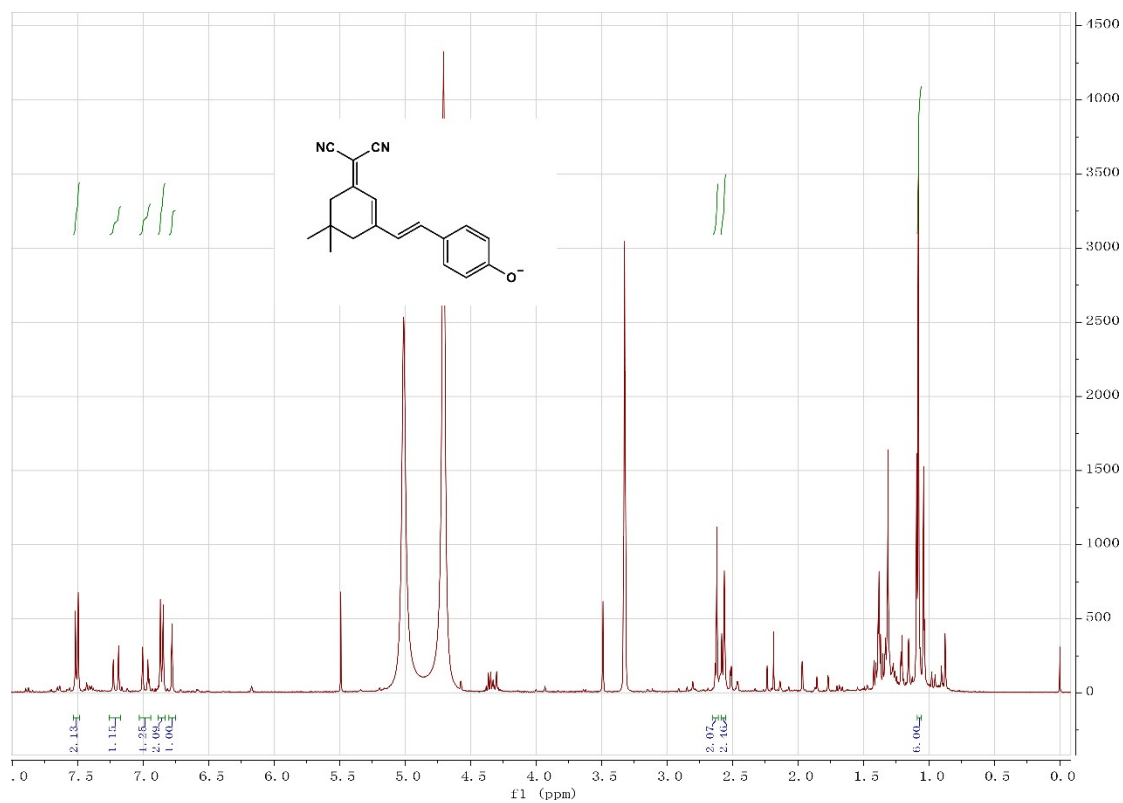

Figure S11. <sup>1</sup>H NMR spectrum of the product obtained from reaction mixture of DDPB with 200 μM NaOH.

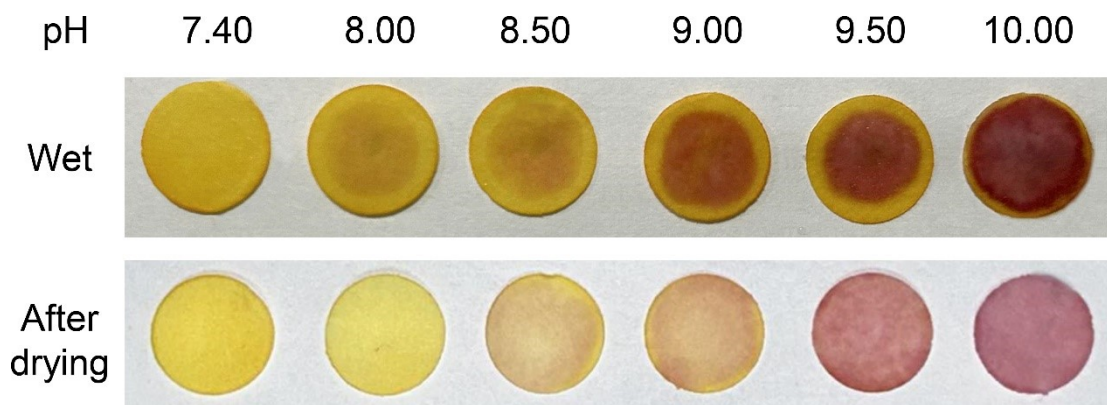

Figure S12 Photographs of DDPB paper-based sensor in response to phosphate buffer solutions with different pH.



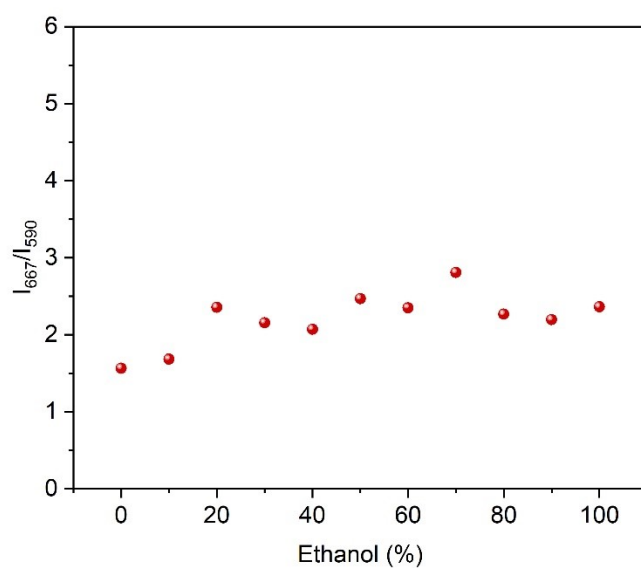

Figure S13 Fluorescence signal ( $I_{667\text{ nm}}/I_{590\text{ nm}}$ ) responses of DDPB ( $30\ \mu\text{M}$ ) incubated in 20 mM phosphate buffer solution with different ethanol concentrations. The excitation wavelength was 430 nm with 5/10 nm slit widths.

Table S1 Fluorescent quantum yield calculation.

| Sample      | Integrated emission<br>intensity area (I) | Absorbance<br>(A) | Refractive<br>index ( $\eta$ ) | Quantum<br>yield ( $\Phi$ ) |
|-------------|-------------------------------------------|-------------------|--------------------------------|-----------------------------|
| Rhodamine B | 41689005                                  | 0.023             | 1.36                           | 89%                         |
| DDPB        | 255467                                    | 0.038             | 1.36                           | 0.33%                       |
| HDM         | 2795215                                   | 0.045             | 1.36                           | 3.05%                       |

Table S2 An overview on recently reported alkaline optical pH sensors.

| Probes                                           | Method                       | Type        | pKa   | pH range   | Application                         | Ref.      |
|--------------------------------------------------|------------------------------|-------------|-------|------------|-------------------------------------|-----------|
| IECBT                                            | Fluorescent                  | Turn off    | 9.75  | 9.48-10.07 | E. coli cells imaging               | [1]       |
| BTNO                                             | Colorimetric and fluorescent | Ratiometric | 7.91  | 7.00-9.50  | HeLa cells imaging                  | [2]       |
| FQ-5                                             | Fluorescent                  | Turn on     | /     | 2-13       | /                                   | [3]       |
| SypHer3s                                         | Colorimetric and fluorescent | Ratiometric | 7.8   | 7.5-9.5    | HEK293 cells imaging                | [4]       |
| TADF                                             | Fluorescent                  | Turn off    | /     | 7.0-8.6    | Alkaliphiles detection              | [5]       |
| AlkaP-1                                          | Fluorescent                  | Turn off    | 8.01  | 7.0-9.0    | Ewing's sarcoma cells imaging       | [6]       |
| BODIPY based probes                              | Colorimetric and fluorescent | Ratiometric | 7.33  | 9.4-9.9    | /                                   | [7]       |
| CADB                                             | Fluorescent                  | Turn on     | 10.62 | 9.65-11.68 | Zebrafish imaging                   | [8]       |
| hemicyanine-naphthalene-based fluorescent sensor | Colorimetric and fluorescent | Ratiometric | /     | 5-12       | paper sensor                        | [9]       |
| PTZ-aminopyrazole                                | Colorimetric and fluorescent | Ratiometric | /     | 11.1-13.8  | paper sensor                        | [10]      |
| PN-SP                                            | fluorescent                  | Turn on     | 10.25 | 9.41–11.30 | HeLa cells imaging                  | [11]      |
| DDPB                                             | Colorimetric and fluorescent | Ratiometric | 9.33  | 7.00-10.23 | HK-2 cells imaging and paper sensor | This work |

## References

1. J. Chao, Z. Li, Y. Zhang, F. Huo, C. Yin, Y. Liu, Y. Li and J. Wang, *J. Materi. Chem. B*, 2016, 4, 3703-3712.
2. B. Lin, L. Fan, Z. Ying, J. Ge, X. Wang, T. Zhang, C. Dong, S. Shuang and M. S. Wong, *Talanta*, 2020, 208, 120279.
3. T.-B. Wei, H.-Q. Dong, X.-Q. Ma, Q.-Y. Yang, Z.-H. Wang, W.-L. Guan, Y.-F. Zhang, Y.-M. Zhang, H. Yao and Q. Lin, *New J. Chem.*, 2021, 45, 5040-5048.
4. A. S. Goryashchenko, A. A. Pakhomov, A. V. Ryabova, I. D. Romanishkin, E. G. Maksimov, A. N. Orsa, O. V. Serova, A. A. Mozhaev, M. A. Maksimova, V. I. Martynov, A. G. Petrenko and I. E. Deyev, *Biosensors*, 2021, 11.
5. Q. Liu, M. Yang, X. Meng, X. Han, M. Nazare, Y. Xu, H.-Y. Hu and Q. Zhang, *Talanta*, 2022, 246, 123493.
6. H. Mai, Y. Wang, S. Li, R. Jia, S. Li, Q. Peng, Y. Xie, X. Hu and S. Wu, *Chem. Commun.*, 2019, 55, 7374-7377.
7. J. Borah, A. Rahman, A. Baruah, P. Dutta and P. Khakhlyar, *J. Photoch. Photobio. A*, 2023, 437, 114423.
8. X. Tian, H. Liu, M. Li, Y. Zhang, C. Zhang, Y. Gao, Z. Wang and S. Wang, *J. Mol. Struct.*, 2022, 1251, 132038.
9. G. Fang, R. Wang, D. Zhan, G. Chen, Y. Huang, Z. Ma, Q. Yao and Z. Wu, *Dyes Pigments*, 2021, 190, 109265.
10. X. Li, X. Zhao, L. Wu, Y. Leng and X. Cai, *ChemistrySelect*, 2022, 7, e202104387.

11. Y. Zhang, A. Qin, S. Gong, M. Li, Z. Meng, Y. Liang, Z. Shen, Z. Wang and S. Wang, *Microchem J*, 2022, 173, 107010.
